# Supplementary material for: Multigene Panel Germline Testing of 1333 Czech Patients with Ovarian Cancer
Source: PubMed Central journal article supplement (PMC7226062; doi:10.3390/cancers12040956), 2020-04-13
Supplement: cancers-12-00956-s001.pdf [file cancers-12-00956-s001.pdf]

**Table S1.** The clinicopathological characteristics of 1,333 ovarian cancer patients.

| Category                                | N    | % of known |
|-----------------------------------------|------|------------|
| <b><i>Age at diagnosis (y)</i></b>      |      |            |
| <30                                     | 84   | 6.46       |
| 30-39                                   | 152  | 11.69      |
| 40-49                                   | 282  | 21.69      |
| 50-59                                   | 360  | 27.69      |
| 60-69                                   | 328  | 25.23      |
| >70                                     | 94   | 7.23       |
| n.a.                                    | 33   |            |
| <b><i>Personal history</i></b>          |      |            |
| OC only                                 | 1045 | 78.39      |
| OC & BC                                 | 210  | 15.75      |
| OC & other cancer                       | 78   | 5.85       |
| <b><i>Family history</i></b>            |      |            |
| HOC                                     | 119  | 9.64       |
| HBOC                                    | 345  | 27.96      |
| Multiple cancer                         | 182  | 14.75      |
| None                                    | 588  | 47.65      |
| n.a.                                    | 99   |            |
| <b><i>Histology</i></b>                 |      |            |
| HG serous                               | 478  | 42.68      |
| LG serous                               | 85   | 7.59       |
| Serous unspecified                      | 165  | 14.73      |
| Endometrioid                            | 90   | 8.04       |
| Mucinous                                | 43   | 3.84       |
| Clear cell                              | 15   | 1.34       |
| Other                                   | 90   | 8.04       |
| Border-line                             | 154  | 13.75      |
| n.a.                                    | 213  |            |
| <b><i>Stage at diagnosis (FIGO)</i></b> |      |            |
| I                                       | 302  | 31.46      |
| II                                      | 86   | 8.96       |
| III                                     | 472  | 49.17      |
| IV                                      | 100  | 10.42      |
| n.a.                                    | 373  |            |

**Table S2. Mutation frequencies in ovarian cancer cases and population-matched controls.**

| Gene                                                                      | 1,333 OC patients<br>N mutations (%) | 1320 OC patients*<br>N patients (%) | 2,278 PMC<br>N mutations (%) | OR (95% CI); p <sup>a)</sup>                |
|---------------------------------------------------------------------------|--------------------------------------|-------------------------------------|------------------------------|---------------------------------------------|
| <b>Increased OC risk<sup>b)</sup></b>                                     |                                      |                                     |                              |                                             |
| <i>BRCA1</i> <sup>c)</sup>                                                | 238 (17.85)                          | 229 (17.35)                         | 5 (0.22)                     | 95.2 (40.1 - 295.2); 1.83×10 <sup>-97</sup> |
| <i>BRCA2</i> <sup>c)</sup>                                                | 99 (7.43)                            | 94 (7.12)                           | 7 (0.31)                     | 24.9 (11.6 - 63.6); 1.16×10 <sup>-33</sup>  |
| <i>RAD51D</i>                                                             | 13 (0.98)                            | 13 (0.98)                           | 2 (0.09)                     | 11.3 (2.6 - 103.4); .9.66×10 <sup>-5</sup>  |
| <i>RAD51C</i>                                                             | 13 (0.98)                            | 13 (0.98)                           | 4 (0.18)                     | 5.7 (1.7 - 23.8); 0.001                     |
| <i>BRIP1</i> <sup>c)</sup>                                                | 11 (0.83)                            | 10 (0.76)                           | 5 (0.22)                     | 3.5 (1.1 - 13); 0.03                        |
| <i>MLH1</i> <sup>c)</sup>                                                 | 5 (0.38)                             | 4 (0.3)                             | 1 (0.04)                     | 6.9 (0.7 - 340.4); 0.06 <sup>d)</sup>       |
| <i>MSH2</i>                                                               | 3 (0.23)                             | 3 (0.23)                            | 0                            | - (-); 0.049 <sup>d)</sup>                  |
| <i>MSH6</i>                                                               | 3 (0.23)                             | 3 (0.23)                            | 0                            | - (-); 0.049 <sup>d)</sup>                  |
| <i>STK11</i>                                                              | 2 (0.15)                             | 2 (0.15)                            | 0                            | - (-); 0.13                                 |
| <b>Potentially increase or insufficient evidence OC risk<sup>b)</sup></b> |                                      |                                     |                              |                                             |
| <i>NBN</i> <sup>c)</sup>                                                  | 16 (1.20)                            | 14 (1.06)                           | 7 (0.31)                     | 3.5 (1.3 - 10.2); 0.006                     |
| <i>PALB2</i>                                                              | 8 (0.60)                             | 8 (0.61)                            | 9 (0.40)                     | 1.5 (0.5 - 4.5); 0.45                       |
| <i>ATM</i> <sup>c)</sup>                                                  | 7 (0.53)                             | 6 (0.45)                            | 8 (0.35)                     | 1.3 (0.4 - 4.3); 0.78                       |
| <i>BARD1</i> <sup>c)</sup>                                                | 5 (0.38)                             | 3 (0.23)                            | 0                            | - (-); 0.049                                |
| <b>No increased risk of OC<sup>b)</sup></b>                               |                                      |                                     |                              |                                             |
| <i>CHEK2</i> <sup>c)</sup>                                                | 13 (0.98)                            | 11 (0.83)                           | 8 (0.35)                     | 2.4 (0.9 - 6.8); 0.06                       |
| <i>TP53</i> <sup>c)</sup>                                                 | 3 (0.23)                             | 1 (0.08)                            | 2 (0.09)                     | 0.9 (0 - 16.6); 1                           |
| <i>CDHI</i> <sup>c)</sup>                                                 | 1 (0.08)                             | 0                                   | 0                            | - (-); 1                                    |
| <i>PTEN</i> <sup>c)</sup>                                                 | 1 (0.08)                             | 0                                   | 0                            | - (-); 1                                    |

\* without multiple mutation carriers

<sup>a)</sup> OR, 95% CI and p was calculated in a group of 1320 OC patients following exclusion of 13 multiple mutation carriers (shown in [Table S3](#)).

<sup>b)</sup> Gene classification according to the NCCN guidelines version 2020.1. We found no mutations in *CDKN2A* and *NF1* in analyzed OC patients.

<sup>c)</sup> 13 multiple mutation carriers: 1×*BRCA1*&*ATM*, 1×*BRCA1*&*CHEK2*, 2×*BRCA1*&*NBN*, 1×*BRCA1*&*PTEN*, 2×*BRCA2*&*BARD1*, 1×*BRCA1*&*TP53*, 1×*BRCA1*&*BRCA2*, 1×*BRCA1*&*BRCA2*&*CDHI*, 1×*BRIP1*&*TP53*, 1×*BRCA1*&*MLH1*, 1×*BRCA2*&*CHEK2* (details provided in [Table S3](#)).

<sup>d)</sup> When analyzed Lynch syndrome genes collectively: OR=22.63 (95%CI 3.4 - 958.5); p=1.95×10<sup>-05</sup>

**Table S3. Clinical and pathological characteristics in multiple mutation carriers**

| <b>Mutation 1</b> | <b>Mutation 2</b> | <b>Mutation 3</b> | <b>OC</b><br>(age at dg; y) | <b>BC</b><br>(age at dg; y) | <b>Other ca</b><br>(age at dg; y) | <b>Family history</b> | <b>OC Histology</b> |
|-------------------|-------------------|-------------------|-----------------------------|-----------------------------|-----------------------------------|-----------------------|---------------------|
| <i>BRCA1</i>      | <i>ATM</i>        | -                 | 46.7                        | 49.8                        | melanoma (46)                     | HOC                   | HG serous           |
| <i>BRCA1</i>      | <i>CHEK2</i>      | -                 | 65.0                        | 65.0                        | -                                 | negative              | HG serous           |
| <i>BRCA1</i>      | <i>NBN</i>        | -                 | 52.1                        | -                           | -                                 | MCF                   | HG serous           |
| <i>BRCA1</i>      | <i>PTEN</i>       | -                 | 34                          | -                           | -                                 | HBOC                  | HG serous           |
| <i>BRCA2</i>      | <i>BARD1</i>      | -                 | 58.6                        | -                           | -                                 | HOC                   | HG serous           |
| <i>BRCA2</i>      | <i>BARD1</i>      | -                 | 53.0                        | -                           | -                                 | HBOC                  | HG serous           |
| <i>BRCA1</i>      | <i>TP53</i>       | -                 | 40.8                        | -                           | -                                 | HBOC                  | LG serous           |
| <i>BRCA1</i>      | <i>BRCA2</i>      | -                 | 48.7                        | 46.5                        | -                                 | HBOC                  | Other               |
| <i>BRIP1</i>      | <i>TP53</i>       | -                 | 30.0                        | 44.0                        | -                                 | MCF                   | Other               |
| <i>BRCA1</i>      | <i>BRCA2</i>      | <i>CDH1</i>       | 56.0                        | n.a.                        | -                                 | HBOC                  | n.a.                |
| <i>BRCA1</i>      | <i>MLH1</i>       | -                 | 42.3                        | 38.3                        | endometrial (58)                  | HBOC                  | n.a.                |
| <i>BRCA1</i>      | <i>NBN</i>        | -                 | 46.0                        | -                           | -                                 | HOC                   | n.a.                |
| <i>BRCA2</i>      | <i>CHEK2</i>      | -                 | 61.7                        | 66.4                        | -                                 | negative              | n.a.                |

n.a. not available; HOC. hereditary ovarian cancer; HBOC. hereditary breast and ovarian cancer; MCF. Multiple cancer families; OC. ovarian cancer; BC. breast cancer; HG. high grade; LG. low grade

**Table S4. Clinicopathological characteristics of mutation carriers in HBOC genes listed in NCCN guidelines** (mutation carriers in a group of 1320 ovarian cancer patients (after exclusion of 13 multiple mutation carriers shown in Table S3). 10 genes significantly associated with OC risk in our study are highlighted.

|                                   | <b>BRCA1</b> | <b>BRCA2</b> | <b>RAD51C</b> | <b>RAD51D</b> | <b>BRIP1</b> | <b>MLH1</b> | <b>MSH2</b> | <b>MSH6</b> | STK11    | <b>NBN</b> | PALB2    | ATM      | <b>BARD1</b> | CHEK2     | TP53     | CDH1     | PTEN     | NF1      | *carriers  | non-carriers | All patients without multiple mutation carriers |
|-----------------------------------|--------------|--------------|---------------|---------------|--------------|-------------|-------------|-------------|----------|------------|----------|----------|--------------|-----------|----------|----------|----------|----------|------------|--------------|-------------------------------------------------|
| <b>Age at dg (y)</b>              |              |              |               |               |              |             |             |             |          |            |          |          |              |           |          |          |          |          |            |              |                                                 |
| <30                               | 2            | 1            | 2             |               |              |             |             |             | 1        | 1          |          | 1        | 1            | 4         |          |          |          |          | 13         | 71           | 84                                              |
| 30-39                             | 20           | 1            |               | 1             | 0            | 1           | 2           | 1           |          | 1          |          |          |              | 1         | 0        |          | 0        |          | 28         | 122          | 150                                             |
| 40-49                             | 79           | 12           | 4             | 3             | 2            | 1           | 1           |             |          | 2          | 2        | 1        |              |           | 0        |          |          |          | 107        | 171          | 278                                             |
| 50-59                             | 84           | 38           | 5             | 5             | 4            | 1           |             | 1           |          | 6          | 1        |          | 1            | 3         |          | 0        |          |          | 149        | 207          | 356                                             |
| 60-69                             | 32           | 33           | 2             | 4             | 3            | 1           |             |             |          | 3          | 3        | 3        |              | 2         |          |          |          |          | 86         | 240          | 326                                             |
| >70                               | 9            | 8            |               |               | 1            |             |             |             | 1        | 1          | 2        | 1        | 1            | 1         | 1        |          |          |          | 27         | 67           | 94                                              |
| n.a.                              | 3            | 1            |               |               |              |             |             |             |          |            |          |          |              |           |          |          |          |          | 4          | 28           | 32                                              |
| <b>Personal history of cancer</b> |              |              |               |               |              |             |             |             |          |            |          |          |              |           |          |          |          |          |            |              |                                                 |
| OC & BC                           | 73           | 28           | 2             | 1             |              |             |             |             |          | 4          | 4        | 1        | 1            | 2         |          |          |          |          | 116        | 87           | 203                                             |
| OC only                           | 149          | 60           | 10            | 12            | 10           | 1           | 2           | 2           | 2        | 9          | 4        | 5        | 1            | 9         | 1        |          |          |          | 277        | 761          | 1038                                            |
| OC & non-BC                       | 7            | 6            | 1             |               |              | 3           | 1           | 1           |          | 1          |          |          | 1            |           |          |          |          |          | 21         | 58           | 79                                              |
| <b>Family history of cancer</b>   |              |              |               |               |              |             |             |             |          |            |          |          |              |           |          |          |          |          |            |              |                                                 |
| HOC                               | 42           | 11           | 1             |               |              |             | 1           | 1           |          |            |          |          | 1            | 3         |          |          |          |          | 60         | 56           | 116                                             |
| HBOC                              | 90           | 37           | 5             | 1             | 2            |             | 2           |             |          | 1          | 1        | 1        | 1            | 2         | 1        |          |          |          | 144        | 195          | 339                                             |
| MCF                               | 33           | 14           |               | 1             |              | 1           |             | 1           |          | 3          | 2        | 2        |              | 2         |          |          |          |          | 59         | 121          | 180                                             |
| no                                | 57           | 28           | 5             | 10            | 7            | 3           |             |             | 1        | 9          | 5        | 3        | 1            | 4         |          |          |          |          | 133        | 454          | 587                                             |
| n.a.                              | 7            | 4            | 2             | 1             | 1            |             |             | 1           | 1        | 1          |          |          |              |           |          |          |          |          | 18         | 80           | 98                                              |
| <b>Stage at diagnosis (y)</b>     |              |              |               |               |              |             |             |             |          |            |          |          |              |           |          |          |          |          |            |              |                                                 |
| I                                 | 26           | 12           | 1             | 1             | 1            | 3           | 1           | 2           |          | 7          |          | 1        |              | 3         |          |          |          |          | 58         | 241          | 299                                             |
| II                                | 20           | 2            |               | 2             |              | 1           |             |             |          | 2          |          |          |              | 2         |          |          |          |          | 29         | 57           | 86                                              |
| III                               | 109          | 39           | 6             | 8             | 4            |             | 1           |             |          |            | 3        | 1        | 2            | 4         |          |          |          |          | 177        | 289          | 466                                             |
| IV                                | 21           | 4            | 4             |               | 2            |             |             |             |          | 2          | 2        | 1        |              |           | 1        |          |          |          | 37         | 63           | 100                                             |
| n.a.                              | 53           | 37           | 2             | 2             | 3            |             | 1           | 1           | 2        | 3          | 3        | 3        | 1            | 2         |          |          |          |          | 113        | 256          | 369                                             |
| <b>Histology</b>                  |              |              |               |               |              |             |             |             |          |            |          |          |              |           |          |          |          |          |            |              |                                                 |
| HG serous                         | 101          | 45           | 5             | 7             | 2            | 2           | 2           |             |          | 3          | 5        | 2        | 1            | 3         |          |          |          |          | 178        | 294          | 472                                             |
| N.S. serous                       | 39           | 13           | 1             | 3             | 2            |             |             |             |          | 1          |          |          | 1            | 1         |          |          |          |          | 61         | 104          | 165                                             |
| Borderline                        | 34           | 10           | 1             | 1             | 2            |             |             |             |          | 1          |          | 2        |              |           | 1        |          |          |          | 52         | 100          | 152                                             |
| Endometrioid                      | 16           | 2            | 2             | 1             | 1            | 2           |             |             |          | 2          |          |          |              | 4         |          |          |          |          | 30         | 60           | 90                                              |
| Mucinous                          | 3            | 2            |               |               |              |             |             |             |          | 2          |          | 1        |              |           |          |          |          |          | 8          | 35           | 43                                              |
| LG serous                         | 8            | 3            | 1             |               |              |             |             |             |          |            |          |          |              |           |          |          |          |          | 12         | 72           | 84                                              |
| Clear cell                        | 1            |              |               |               |              |             |             | 1           |          |            |          |          |              |           |          |          |          |          | 2          | 13           | 15                                              |
| Other                             | 2            | 1            |               |               | 1            |             |             | 1           | 1        | 2          | 1        |          |              | 1         |          |          |          |          | 10         | 80           | 90                                              |
| n.a.                              | 25           | 18           | 3             | 1             | 2            |             | 1           | 1           | 1        | 3          | 2        | 1        | 1            | 2         |          |          |          |          | 61         | 148          | 209                                             |
| <b>Sum</b>                        | <b>229</b>   | <b>94</b>    | <b>13</b>     | <b>13</b>     | <b>10</b>    | <b>4</b>    | <b>3</b>    | <b>3</b>    | <b>2</b> | <b>14</b>  | <b>8</b> | <b>6</b> | <b>3</b>     | <b>11</b> | <b>1</b> | <b>0</b> | <b>0</b> | <b>0</b> | <b>414</b> | <b>906</b>   | <b>1320</b>                                     |

**Table S5. Mutations in 201 additional analyzed genes with associated OC risk. Significantly associated genes (p<0.05) are highlighted.**

| Gene         | All patients (N=1,333) |        | Controls (N=2,278) |        | OR   | 95% CI |       | p       |
|--------------|------------------------|--------|--------------------|--------|------|--------|-------|---------|
|              | N (Mut)                | N (WT) | N (Mut)            | N (WT) |      |        |       |         |
| <b>PPM1D</b> | 15                     | 1318   | 2                  | 2276   | 12.9 | 3.0    | 116.9 | 1.8E-05 |
| <b>NAT1</b>  | 13                     | 1320   | 5                  | 2273   | 4.5  | 1.5    | 16.1  | 0.0027  |
| FANJ         | 8                      | 1325   | 6                  | 2272   | 2.3  | 0.7    | 8.0   | 0.16    |
| MMP8         | 6                      | 1327   | 4                  | 2274   | 2.6  | 0.6    | 12.4  | 0.19    |
| PMS1         | 6                      | 1327   | 3                  | 2275   | 3.4  | 0.7    | 21.2  | 0.084   |
| HELO         | 6                      | 1327   | 2                  | 2276   | 5.1  | 0.9    | 52.2  | 0.058   |
| FANCG        | 5                      | 1328   | 2                  | 2276   | 4.3  | 0.7    | 45.0  | 0.11    |
| EXO1         | 5                      | 1328   | 2                  | 2276   | 4.3  | 0.7    | 45.0  | 0.11    |
| RECQL4       | 5                      | 1328   | 6                  | 2272   | 1.4  | 0.3    | 5.6   | 0.55    |
| FANCM        | 5                      | 1328   | 6                  | 2272   | 1.4  | 0.3    | 5.6   | 0.55    |
| <b>SHPRH</b> | 5                      | 1328   | 1                  | 2277   | 8.6  | 1.0    | 404.8 | 0.028   |
| FANCI        | 5                      | 1328   | 6                  | 2272   | 1.4  | 0.3    | 5.6   | 0.55    |
| RAD50        | 5                      | 1328   | 5                  | 2273   | 1.7  | 0.4    | 7.5   | 0.51    |
| RECQL        | 4                      | 1329   | 7                  | 2271   | 1.0  | 0.2    | 3.8   | 1.00    |
| RECQL5       | 4                      | 1329   | 7                  | 2271   | 1.0  | 0.2    | 3.8   | 1.00    |
| MCPH1        | 4                      | 1329   | 11                 | 2267   | 0.6  | 0.1    | 2.1   | 0.59    |
| RAD54L       | 4                      | 1329   | 4                  | 2274   | 1.7  | 0.3    | 9.2   | 0.48    |
| FANCD2       | 3                      | 1330   | 1                  | 2277   | 5.1  | 0.4    | 269.3 | 0.15    |
| MLH3         | 3                      | 1330   | 3                  | 2275   | 1.7  | 0.2    | 12.8  | 0.68    |
| FANCA        | 3                      | 1330   | 2                  | 2276   | 2.6  | 0.3    | 30.8  | 0.37    |
| SETX         | 3                      | 1330   | 2                  | 2276   | 2.6  | 0.3    | 30.8  | 0.37    |
| TELO2        | 3                      | 1330   | 4                  | 2274   | 1.3  | 0.2    | 7.6   | 0.71    |
| MSR1         | 3                      | 1330   | 5                  | 2273   | 1.0  | 0.2    | 5.3   | 1.00    |
| MSH3         | 3                      | 1330   | 9                  | 2269   | 0.6  | 0.1    | 2.3   | 0.55    |
| RFC4         | 3                      | 1330   | 0                  | 2278   | n.a. |        |       | 0.050   |
| ZNF365       | 3                      | 1330   | 0                  | 2278   | n.a. |        |       | 0.050   |
| MPL          | 3                      | 1330   | 1                  | 2277   | 5.1  | 0.4    | 269.3 | 0.15    |
| RAD18        | 3                      | 1330   | 1                  | 2277   | 5.1  | 0.4    | 269.3 | 0.15    |
| ALK          | 3                      | 1330   | 3                  | 2275   | 1.7  | 0.2    | 12.8  | 0.68    |
| SLX4         | 3                      | 1330   | 3                  | 2275   | 1.7  | 0.2    | 12.8  | 0.68    |
| MUS81        | 2                      | 1331   | 1                  | 2277   | 3.4  | 0.2    | 201.7 | 0.56    |
| NF1          | 2                      | 1331   | 1                  | 2277   | 3.4  | 0.2    | 201.7 | 0.56    |
| XPA          | 2                      | 1331   | 1                  | 2277   | 3.4  | 0.2    | 201.7 | 0.56    |
| DPYD         | 2                      | 1331   | 2                  | 2276   | 1.7  | 0.1    | 23.6  | 0.63    |
| RNF168       | 2                      | 1331   | 2                  | 2276   | 1.7  | 0.1    | 23.6  | 0.63    |
| OGG1         | 2                      | 1331   | 3                  | 2275   | 1.1  | 0.1    | 10.0  | 1.00    |
| RAD51B       | 2                      | 1331   | 3                  | 2275   | 1.1  | 0.1    | 10.0  | 1.00    |
| TLR2         | 2                      | 1331   | 3                  | 2275   | 1.1  | 0.1    | 10.0  | 1.00    |
| FANCF        | 2                      | 1331   | 4                  | 2274   | 0.9  | 0.1    | 6.0   | 1.00    |
| ATR          | 2                      | 1331   | 6                  | 2272   | 0.6  | 0.1    | 3.2   | 0.72    |
| WRN          | 2                      | 1331   | 8                  | 2270   | 0.4  | 0.0    | 2.1   | 0.34    |
| BLM          | 2                      | 1331   | 9                  | 2269   | 0.4  | 0.0    | 1.8   | 0.35    |
| XRCC1        | 2                      | 1331   | 9                  | 2269   | 0.4  | 0.0    | 1.8   | 0.35    |
| BUB1B        | 2                      | 1331   | 0                  | 2278   | n.a. |        |       | 0.14    |
| ERCC5        | 2                      | 1331   | 0                  | 2278   | n.a. |        |       | 0.14    |
| RAD52        | 2                      | 1331   | 0                  | 2278   | n.a. |        |       | 0.14    |
| BRCC3        | 2                      | 1331   | 1                  | 2277   | 3.4  | 0.2    | 201.7 | 0.56    |
| UIMC1        | 2                      | 1331   | 1                  | 2277   | 3.4  | 0.2    | 201.7 | 0.56    |
| PLA2G2A      | 2                      | 1331   | 2                  | 2276   | 1.7  | 0.1    | 23.6  | 0.63    |
| POLE         | 2                      | 1331   | 3                  | 2275   | 1.1  | 0.1    | 10.0  | 1.00    |
| ATRIP        | 2                      | 1331   | 4                  | 2274   | 0.9  | 0.1    | 6.0   | 1.00    |
| DNAJC21      | 2                      | 1331   | 4                  | 2274   | 0.9  | 0.1    | 6.0   | 1.00    |
| ERCC3        | 2                      | 1331   | 10                 | 2268   | 0.3  | 0.0    | 1.6   | 0.23    |
| ERCC6        | 2                      | 1331   | 0                  | 2278   | n.a. |        |       | 0.14    |
| FAAP24       | 2                      | 1331   | 0                  | 2278   | n.a. |        |       | 0.14    |
| APEX1        | 2                      | 1331   | 5                  | 2273   | 0.7  | 0.1    | 4.2   | 1.00    |
| CASP8        | 1                      | 1332   | 1                  | 2277   | 1.7  | 0.0    | 134.1 | 1.00    |
| DMC1         | 1                      | 1332   | 1                  | 2277   | 1.7  | 0.0    | 134.1 | 1.00    |
| FANCE        | 1                      | 1332   | 1                  | 2277   | 1.7  | 0.0    | 134.1 | 1.00    |
| FLCN         | 1                      | 1332   | 1                  | 2277   | 1.7  | 0.0    | 134.1 | 1.00    |
| RAD1         | 1                      | 1332   | 1                  | 2277   | 1.7  | 0.0    | 134.1 | 1.00    |
| SDHAF2       | 1                      | 1332   | 1                  | 2277   | 1.7  | 0.0    | 134.1 | 1.00    |
| XRCC4        | 1                      | 1332   | 1                  | 2277   | 1.7  | 0.0    | 134.1 | 1.00    |
| CWF19L2      | 1                      | 1332   | 2                  | 2276   | 0.9  | 0.0    | 16.4  | 1.00    |
| POLD1        | 1                      | 1332   | 2                  | 2276   | 0.9  | 0.0    | 16.4  | 1.00    |
| TLR4         | 1                      | 1332   | 2                  | 2276   | 0.9  | 0.0    | 16.4  | 1.00    |
| NCAM1        | 1                      | 1332   | 3                  | 2275   | 0.6  | 0.0    | 7.1   | 1.00    |
| PRF1         | 1                      | 1332   | 3                  | 2275   | 0.6  | 0.0    | 7.1   | 1.00    |
| TSHR         | 1                      | 1332   | 3                  | 2275   | 0.6  | 0.0    | 7.1   | 1.00    |
| LIG3         | 1                      | 1332   | 4                  | 2274   | 0.4  | 0.0    | 4.3   | 0.66    |
| RAD54B       | 1                      | 1332   | 5                  | 2273   | 0.3  | 0.0    | 3.1   | 0.42    |
| DCLRE1C      | 1                      | 1332   | 10                 | 2268   | 0.2  | 0.0    | 1.2   | 0.064   |
| MDC1         | 1                      | 1332   | 13                 | 2265   | 0.1  | 0.0    | 0.9   | 0.024   |
| BRAP         | 1                      | 1332   | 0                  | 2278   | n.a. |        |       | 0.37    |
| GRB7         | 1                      | 1332   | 0                  | 2278   | n.a. |        |       | 0.37    |
| HOXB13       | 1                      | 1332   | 0                  | 2278   | n.a. |        |       | 0.37    |
| CHEK1        | 1                      | 1332   | 0                  | 2278   | n.a. |        |       | 0.37    |
| LIG4         | 1                      | 1332   | 0                  | 2278   | n.a. |        |       | 0.37    |
| PTCH1        | 1                      | 1332   | 0                  | 2278   | n.a. |        |       | 0.37    |
| RAD9A        | 1                      | 1332   | 0                  | 2278   | n.a. |        |       | 0.37    |
| RUNX1        | 1                      | 1332   | 0                  | 2278   | n.a. |        |       | 0.37    |
| SBDS         | 1                      | 1332   | 0                  | 2278   | n.a. |        |       | 0.37    |

|         |   |      |   |      |      |     |       |       |
|---------|---|------|---|------|------|-----|-------|-------|
| TERF2   | 1 | 1332 | 0 | 2278 | n.a. |     |       | 0.37  |
| AIP     | 1 | 1332 | 1 | 2277 | 1.7  | 0.0 | 134.1 | 1.00  |
| FAM175A | 1 | 1332 | 1 | 2277 | 1.7  | 0.0 | 134.1 | 1.00  |
| EPHX1   | 1 | 1332 | 2 | 2276 | 0.9  | 0.0 | 16.4  | 1.00  |
| RBBP8   | 1 | 1332 | 2 | 2276 | 0.9  | 0.0 | 16.4  | 1.00  |
| ERCC2   | 1 | 1332 | 6 | 2272 | 0.3  | 0.0 | 2.3   | 0.27  |
| RFC1    | 1 | 1332 | 0 | 2278 | n.a. |     |       | 0.37  |
| ATMIN   | 0 | 1333 | 1 | 2277 | 0.0  | 0.0 | 66.6  | 1.00  |
| BABAM1  | 0 | 1333 | 1 | 2277 | 0.0  | 0.0 | 66.6  | 1.00  |
| BRE     | 0 | 1333 | 1 | 2277 | 0.0  | 0.0 | 66.6  | 1.00  |
| CSNK1D  | 0 | 1333 | 1 | 2277 | 0.0  | 0.0 | 66.6  | 1.00  |
| CYLD    | 0 | 1333 | 1 | 2277 | 0.0  | 0.0 | 66.6  | 1.00  |
| DDB2    | 0 | 1333 | 1 | 2277 | 0.0  | 0.0 | 66.6  | 1.00  |
| ERCC4   | 0 | 1333 | 1 | 2277 | 0.0  | 0.0 | 66.6  | 1.00  |
| EXT2    | 0 | 1333 | 1 | 2277 | 0.0  | 0.0 | 66.6  | 1.00  |
| EYA2    | 0 | 1333 | 1 | 2277 | 0.0  | 0.0 | 66.6  | 1.00  |
| FANCL   | 0 | 1333 | 1 | 2277 | 0.0  | 0.0 | 66.6  | 1.00  |
| HUS1    | 0 | 1333 | 1 | 2277 | 0.0  | 0.0 | 66.6  | 1.00  |
| KCNJ5   | 0 | 1333 | 1 | 2277 | 0.0  | 0.0 | 66.6  | 1.00  |
| NELFB   | 0 | 1333 | 1 | 2277 | 0.0  | 0.0 | 66.6  | 1.00  |
| NFKBIZ  | 0 | 1333 | 1 | 2277 | 0.0  | 0.0 | 66.6  | 1.00  |
| NSD1    | 0 | 1333 | 1 | 2277 | 0.0  | 0.0 | 66.6  | 1.00  |
| POLB    | 0 | 1333 | 1 | 2277 | 0.0  | 0.0 | 66.6  | 1.00  |
| PRKDC   | 0 | 1333 | 1 | 2277 | 0.0  | 0.0 | 66.6  | 1.00  |
| PTTG2   | 0 | 1333 | 1 | 2277 | 0.0  | 0.0 | 66.6  | 1.00  |
| RHBDF2  | 0 | 1333 | 1 | 2277 | 0.0  | 0.0 | 66.6  | 1.00  |
| TCL1A   | 0 | 1333 | 1 | 2277 | 0.0  | 0.0 | 66.6  | 1.00  |
| TP53BP1 | 0 | 1333 | 1 | 2277 | 0.0  | 0.0 | 66.6  | 1.00  |
| TSC1    | 0 | 1333 | 1 | 2277 | 0.0  | 0.0 | 66.6  | 1.00  |
| UBE2V2  | 0 | 1333 | 1 | 2277 | 0.0  | 0.0 | 66.6  | 1.00  |
| XPC     | 0 | 1333 | 1 | 2277 | 0.0  | 0.0 | 66.6  | 1.00  |
| ZNF350  | 0 | 1333 | 1 | 2277 | 0.0  | 0.0 | 66.6  | 1.00  |
| CEP57   | 0 | 1333 | 2 | 2276 | 0.0  | 0.0 | 9.1   | 0.53  |
| FANCB   | 0 | 1333 | 2 | 2276 | 0.0  | 0.0 | 9.1   | 0.53  |
| MUTYH   | 0 | 1333 | 2 | 2276 | 0.0  | 0.0 | 9.1   | 0.53  |
| RFC1    | 0 | 1333 | 2 | 2276 | 0.0  | 0.0 | 9.1   | 0.53  |
| XRCC2   | 0 | 1333 | 2 | 2276 | 0.0  | 0.0 | 9.1   | 0.53  |
| XRCC3   | 0 | 1333 | 2 | 2276 | 0.0  | 0.0 | 9.1   | 0.53  |
| ESR2    | 0 | 1333 | 3 | 2275 | 0.0  | 0.0 | 4.1   | 0.30  |
| HNFL1A  | 0 | 1333 | 3 | 2275 | 0.0  | 0.0 | 4.1   | 0.30  |
| MSH5    | 0 | 1333 | 3 | 2275 | 0.0  | 0.0 | 4.1   | 0.30  |
| PREX2   | 0 | 1333 | 4 | 2274 | 0.0  | 0.0 | 2.6   | 0.30  |
| FANCC   | 0 | 1333 | 5 | 2273 | 0.0  | 0.0 | 1.9   | 0.17  |
| SMAD4   | 0 | 1333 | 5 | 2273 | 0.0  | 0.0 | 1.9   | 0.17  |
| AURKA   | 0 | 1333 | 9 | 2269 | 0.0  | 0.0 | 0.9   | 0.031 |

**Table 5. cont.** Prevalence of mutations in 201 additional genes in 934 patients negative for mutations in 10 genes significantly associated with OC in our study

|        | Negative pts (N=934)* |        | Controls (N=2,278) |      | OR   | 95% CI |       | p       |
|--------|-----------------------|--------|--------------------|------|------|--------|-------|---------|
|        | N (Mut)               | N (WT) | N (Mut)            | N    |      |        |       |         |
| PPM1D  | 12                    | 922    | 2                  | 2276 | 14.8 | 3.3    | 136.7 | 1.7E-05 |
| NAT1   | 8                     | 926    | 5                  | 2273 | 3.9  | 1.1    | 15.3  | 0.0262  |
| FAN1   | 5                     | 929    | 6                  | 2272 | 2.0  | 0.5    | 8.0   | 0.32    |
| MMP8   | 6                     | 928    | 4                  | 2274 | 3.7  | 0.9    | 17.7  | 0.041   |
| PMS1   | 5                     | 929    | 3                  | 2275 | 4.1  | 0.8    | 26.3  | 0.051   |
| HELQ   | 4                     | 930    | 2                  | 2276 | 4.9  | 0.7    | 54.1  | 0.063   |
| FANCG  | 5                     | 929    | 2                  | 2276 | 6.1  | 1.0    | 64.4  | 0.025   |
| EXO1   | 4                     | 930    | 2                  | 2276 | 4.9  | 0.7    | 54.1  | 0.063   |
| RECQL4 | 4                     | 930    | 6                  | 2272 | 1.6  | 0.3    | 6.9   | 0.49    |
| FANCM  | 3                     | 931    | 6                  | 2272 | 1.2  | 0.2    | 5.7   | 0.73    |
| SHPRH  | 2                     | 932    | 1                  | 2277 | 4.9  | 0.3    | 287.9 | 0.20    |
| FANCI  | 2                     | 932    | 6                  | 2272 | 0.8  | 0.1    | 4.6   | 1.00    |
| RAD50  | 2                     | 932    | 5                  | 2273 | 1.0  | 0.1    | 6.0   | 1.00    |
| RECQL  | 3                     | 931    | 7                  | 2271 | 1.0  | 0.2    | 4.6   | 1.00    |
| RECQL5 | 3                     | 931    | 7                  | 2271 | 1.0  | 0.2    | 4.6   | 1.00    |
| MCPHI  | 3                     | 931    | 11                 | 2267 | 0.7  | 0.1    | 2.5   | 0.77    |
| RAD54L | 2                     | 932    | 4                  | 2274 | 1.2  | 0.1    | 8.5   | 1.00    |
| FANCD2 | 3                     | 931    | 1                  | 2277 | 7.3  | 0.6    | 384.5 | 0.077   |
| MLH3   | 3                     | 931    | 3                  | 2275 | 2.4  | 0.3    | 18.3  | 0.37    |
| FANCA  | 2                     | 932    | 2                  | 2276 | 2.4  | 0.2    | 33.7  | 0.58    |
| SETX   | 2                     | 932    | 2                  | 2276 | 2.4  | 0.2    | 33.7  | 0.58    |
| TELQ2  | 2                     | 932    | 4                  | 2274 | 1.2  | 0.1    | 8.5   | 1.00    |
| MSR1   | 2                     | 932    | 5                  | 2273 | 1.0  | 0.1    | 6.0   | 1.00    |
| MSH3   | 2                     | 932    | 9                  | 2269 | 0.5  | 0.1    | 2.6   | 0.53    |
| RFC4   | 2                     | 932    | 0                  | 2278 | n.a. |        |       | 0.084   |
| ZNF365 | 2                     | 932    | 0                  | 2278 | n.a. |        |       | 0.084   |
| MPL    | 1                     | 933    | 1                  | 2277 | 2.4  | 0.0    | 191.4 | 0.50    |
| RAD18  | 1                     | 933    | 1                  | 2277 | 2.4  | 0.0    | 191.4 | 0.50    |
| ALK    | 1                     | 933    | 3                  | 2275 | 0.8  | 0.0    | 10.1  | 1.00    |
| SLX4   | 1                     | 933    | 3                  | 2275 | 0.8  | 0.0    | 10.1  | 1.00    |
| MUS81  | 2                     | 932    | 1                  | 2277 | 4.9  | 0.3    | 287.9 | 0.20    |
| NF1    | 2                     | 932    | 1                  | 2277 | 4.9  | 0.3    | 287.9 | 0.20    |
| XPA    | 2                     | 932    | 1                  | 2277 | 4.9  | 0.3    | 287.9 | 0.20    |
| DPYD   | 2                     | 932    | 2                  | 2276 | 2.4  | 0.2    | 33.7  | 0.58    |
| RNF168 | 2                     | 932    | 2                  | 2276 | 2.4  | 0.2    | 33.7  | 0.58    |
| OGG1   | 2                     | 932    | 3                  | 2275 | 1.6  | 0.1    | 14.2  | 0.63    |
| RAD51B | 2                     | 932    | 3                  | 2275 | 1.6  | 0.1    | 14.2  | 0.63    |

|         |   |     |    |      |      |     |       |       |
|---------|---|-----|----|------|------|-----|-------|-------|
| TLR2    | 2 | 932 | 3  | 2275 | 1.6  | 0.1 | 14.2  | 0.63  |
| FANCF   | 2 | 932 | 4  | 2274 | 1.2  | 0.1 | 8.5   | 1.00  |
| ATR     | 2 | 932 | 6  | 2272 | 0.8  | 0.1 | 4.6   | 1.00  |
| WRN     | 2 | 932 | 8  | 2270 | 0.6  | 0.1 | 3.1   | 0.73  |
| BLM     | 2 | 932 | 9  | 2269 | 0.5  | 0.1 | 2.6   | 0.53  |
| XRCC1   | 2 | 932 | 9  | 2269 | 0.5  | 0.1 | 2.6   | 0.53  |
| BUB1B   | 2 | 932 | 0  | 2278 | n.a. |     |       | 0.084 |
| ERCC5   | 2 | 932 | 0  | 2278 | n.a. |     |       | 0.084 |
| RAD52   | 2 | 932 | 0  | 2278 | n.a. |     |       | 0.084 |
| BRCC3   | 1 | 933 | 1  | 2277 | 2.4  | 0.0 | 191.4 | 0.50  |
| UIMC1   | 1 | 933 | 1  | 2277 | 2.4  | 0.0 | 191.4 | 0.50  |
| PLA2G2A | 1 | 933 | 2  | 2276 | 1.2  | 0.0 | 23.5  | 1.00  |
| POLE    | 1 | 933 | 3  | 2275 | 0.8  | 0.0 | 10.1  | 1.00  |
| ATRIP   | 1 | 933 | 4  | 2274 | 0.6  | 0.0 | 6.2   | 1.00  |
| DNAJC21 | 1 | 933 | 4  | 2274 | 0.6  | 0.0 | 6.2   | 1.00  |
| ERCC3   | 1 | 933 | 10 | 2268 | 0.2  | 0.0 | 1.7   | 0.19  |
| ERCC6   | 1 | 933 | 0  | 2278 | n.a. |     |       | 0.29  |
| FAAP24  | 1 | 933 | 0  | 2278 | n.a. |     |       | 0.29  |
| APEX1   | 0 | 934 | 5  | 2273 | 0.0  | 0.0 | 2.7   | 0.33  |
| CASP8   | 1 | 933 | 1  | 2277 | 2.4  | 0.0 | 191.4 | 0.50  |
| DMC1    | 1 | 933 | 1  | 2277 | 2.4  | 0.0 | 191.4 | 0.50  |
| FANCE   | 1 | 933 | 1  | 2277 | 2.4  | 0.0 | 191.4 | 0.50  |
| FLCN    | 1 | 933 | 1  | 2277 | 2.4  | 0.0 | 191.4 | 0.50  |
| RAD1    | 1 | 933 | 1  | 2277 | 2.4  | 0.0 | 191.4 | 0.50  |
| SDHAF2  | 1 | 933 | 1  | 2277 | 2.4  | 0.0 | 191.4 | 0.50  |
| XRCC4   | 1 | 933 | 1  | 2277 | 2.4  | 0.0 | 191.4 | 0.50  |
| CWF19L2 | 1 | 933 | 2  | 2276 | 1.2  | 0.0 | 23.5  | 1.00  |
| POLD1   | 1 | 933 | 2  | 2276 | 1.2  | 0.0 | 23.5  | 1.00  |
| TLR4    | 1 | 933 | 2  | 2276 | 1.2  | 0.0 | 23.5  | 1.00  |
| NCAM1   | 1 | 933 | 3  | 2275 | 0.8  | 0.0 | 10.1  | 1.00  |
| PRF1    | 1 | 933 | 3  | 2275 | 0.8  | 0.0 | 10.1  | 1.00  |
| TSHR    | 1 | 933 | 3  | 2275 | 0.8  | 0.0 | 10.1  | 1.00  |
| LIG3    | 1 | 933 | 4  | 2274 | 0.6  | 0.0 | 6.2   | 1.00  |
| RAD54B  | 1 | 933 | 5  | 2273 | 0.5  | 0.0 | 4.4   | 0.68  |
| DCLRE1C | 1 | 933 | 10 | 2268 | 0.2  | 0.0 | 1.7   | 0.19  |
| MDC1    | 1 | 933 | 13 | 2265 | 0.2  | 0.0 | 1.2   | 0.080 |
| BRAP    | 1 | 933 | 0  | 2278 | n.a. |     |       | 0.29  |
| GRB7    | 1 | 933 | 0  | 2278 | n.a. |     |       | 0.29  |
| HOXB13  | 1 | 933 | 0  | 2278 | n.a. |     |       | 0.29  |
| CHEK1   | 1 | 933 | 0  | 2278 | n.a. |     |       | 0.29  |
| LIG4    | 1 | 933 | 0  | 2278 | n.a. |     |       | 0.29  |
| PTCH1   | 1 | 933 | 0  | 2278 | n.a. |     |       | 0.29  |
| RAD9A   | 1 | 933 | 0  | 2278 | n.a. |     |       | 0.29  |
| RUNX1   | 1 | 933 | 0  | 2278 | n.a. |     |       | 0.29  |
| SBDS    | 1 | 933 | 0  | 2278 | n.a. |     |       | 0.29  |
| TERF2   | 1 | 933 | 0  | 2278 | n.a. |     |       | 0.29  |
| AIP     | 0 | 934 | 1  | 2277 | 0.0  | 0.0 | 95.0  | 1.00  |
| FAM175A | 0 | 934 | 1  | 2277 | 0.0  | 0.0 | 95.0  | 1.00  |
| EPHX1   | 0 | 934 | 2  | 2276 | 0.0  | 0.0 | 13.0  | 1.00  |
| RBBP8   | 0 | 934 | 2  | 2276 | 0.0  | 0.0 | 13.0  | 1.00  |
| ERCC2   | 0 | 934 | 6  | 2272 | 0.0  | 0.0 | 2.1   | 0.19  |
| RFC1    | 0 | 934 | 0  | 2278 | n.a. |     |       | 1.00  |
| ATMIN   | 0 | 934 | 1  | 2277 | 0.0  | 0.0 | 95.0  | 1.00  |
| BABAM1  | 0 | 934 | 1  | 2277 | 0.0  | 0.0 | 95.0  | 1.00  |
| BRE     | 0 | 934 | 1  | 2277 | 0.0  | 0.0 | 95.0  | 1.00  |
| CSNK1D  | 0 | 934 | 1  | 2277 | 0.0  | 0.0 | 95.0  | 1.00  |
| CYLD    | 0 | 934 | 1  | 2277 | 0.0  | 0.0 | 95.0  | 1.00  |
| DDB2    | 0 | 934 | 1  | 2277 | 0.0  | 0.0 | 95.0  | 1.00  |
| ERCC4   | 0 | 934 | 1  | 2277 | 0.0  | 0.0 | 95.0  | 1.00  |
| EXT2    | 0 | 934 | 1  | 2277 | 0.0  | 0.0 | 95.0  | 1.00  |
| EYA2    | 0 | 934 | 1  | 2277 | 0.0  | 0.0 | 95.0  | 1.00  |
| FANCL   | 0 | 934 | 1  | 2277 | 0.0  | 0.0 | 95.0  | 1.00  |
| HUS1    | 0 | 934 | 1  | 2277 | 0.0  | 0.0 | 95.0  | 1.00  |
| KCNJ5   | 0 | 934 | 1  | 2277 | 0.0  | 0.0 | 95.0  | 1.00  |
| NELFB   | 0 | 934 | 1  | 2277 | 0.0  | 0.0 | 95.0  | 1.00  |
| NFKBIZ  | 0 | 934 | 1  | 2277 | 0.0  | 0.0 | 95.0  | 1.00  |
| NSD1    | 0 | 934 | 1  | 2277 | 0.0  | 0.0 | 95.0  | 1.00  |
| POLB    | 0 | 934 | 1  | 2277 | 0.0  | 0.0 | 95.0  | 1.00  |
| PRKDC   | 0 | 934 | 1  | 2277 | 0.0  | 0.0 | 95.0  | 1.00  |
| PTTG2   | 0 | 934 | 1  | 2277 | 0.0  | 0.0 | 95.0  | 1.00  |
| RHBDP2  | 0 | 934 | 1  | 2277 | 0.0  | 0.0 | 95.0  | 1.00  |
| TCLL1A  | 0 | 934 | 1  | 2277 | 0.0  | 0.0 | 95.0  | 1.00  |
| TP53BP1 | 0 | 934 | 1  | 2277 | 0.0  | 0.0 | 95.0  | 1.00  |
| TSC1    | 0 | 934 | 1  | 2277 | 0.0  | 0.0 | 95.0  | 1.00  |
| UBE2V2  | 0 | 934 | 1  | 2277 | 0.0  | 0.0 | 95.0  | 1.00  |
| XPC     | 0 | 934 | 1  | 2277 | 0.0  | 0.0 | 95.0  | 1.00  |
| ZNF350  | 0 | 934 | 1  | 2277 | 0.0  | 0.0 | 95.0  | 1.00  |
| CEP57   | 0 | 934 | 2  | 2276 | 0.0  | 0.0 | 13.0  | 1.00  |
| FANCB   | 0 | 934 | 2  | 2276 | 0.0  | 0.0 | 13.0  | 1.00  |
| MUTYH   | 0 | 934 | 2  | 2276 | 0.0  | 0.0 | 13.0  | 1.00  |
| RFC1    | 0 | 934 | 2  | 2276 | 0.0  | 0.0 | 13.0  | 1.00  |
| XRCC2   | 0 | 934 | 2  | 2276 | 0.0  | 0.0 | 13.0  | 1.00  |
| XRCC3   | 0 | 934 | 2  | 2276 | 0.0  | 0.0 | 13.0  | 1.00  |
| ESR2    | 0 | 934 | 3  | 2275 | 0.0  | 0.0 | 5.9   | 0.56  |
| HNFL1A  | 0 | 934 | 3  | 2275 | 0.0  | 0.0 | 5.9   | 0.56  |
| MSH5    | 0 | 934 | 3  | 2275 | 0.0  | 0.0 | 5.9   | 0.56  |
| PREX2   | 0 | 934 | 4  | 2274 | 0.0  | 0.0 | 3.7   | 0.33  |
| FANCC   | 0 | 934 | 5  | 2273 | 0.0  | 0.0 | 2.7   | 0.33  |
| SMAD4   | 0 | 934 | 5  | 2273 | 0.0  | 0.0 | 2.7   | 0.33  |
| AURKA   | 0 | 934 | 9  | 2269 | 0.0  | 0.0 | 1.2   | 0.067 |

**Table S6. Characteristics of 15 PPM1D mutation carriers.** (The increasing age at OC diagnoses and the time of blood sampling from the last chemotherapy are displayed in a red-to-green gradient)

| ID       | Age at dg. | Center | Exon | c.             | p.           | WT reads | MUT reads | MAF  | Genetic sampling | Last chemoth. | Sampling from last chemoth. (years) | Other Pathogenic mut. |
|----------|------------|--------|------|----------------|--------------|----------|-----------|------|------------------|---------------|-------------------------------------|-----------------------|
| 3094     | 43.9       | VFN    | 6    | c.C1528T       | p.Q510X      | 89       | 14        | 0,14 | 21-Apr-2016      | 15-Aug-2012   | 3.68                                | -                     |
| cz1475   | 56.0       | VFN    | 6    | c.1632dupC     | p.G544fs     | 128      | 52        | 0,29 | n.a.             | n.a.          | n.a.                                | -                     |
| 306_16   | 59.0       | MOU    | 6    | c.1524delG     | p.M508fs     | 129      | 35        | 0,21 | n.a.             | n.a.          | n.a.                                | <i>EXO1</i>           |
| 2480     | 59.7       | VFN    | 6    | c.1449dupT     | p.T483fs     | 106      | 18        | 0,15 | 24-Apr-2014      | 14-Mar-2007   | 7.11                                | -                     |
| 1897     | 60.1       | VFN    | 6    | c.C1403G       | p.S468X      | 69       | 13        | 0,16 | 12-Apr-2012      | 23-Jun-2009   | 2.80                                | -                     |
| CZE239   | 63.0       | ANJ    | 6    | c.C1372T       | p.R458X      | 65       | 15        | 0,19 | n.a.             | n.a.          | n.a.                                | -                     |
| 2045     | 64.8       | VFN    | 6    | c.1529delA     | p.Q510fs     | 84       | 52        | 0,38 | n.a.             | n.a.          | n.a.                                | <i>BRCA2</i>          |
| 3120     | 64.8       | VFN    | 6    | c.1449delT     | p.T483fs     | 178      | 33        | 0,16 | n.a.             | n.a.          | n.a.                                | <i>BRCA2</i>          |
| 5263_17  | 65.0       | GEN    | 1    | c.325delG      | p.G109fs     | 106      | 19        | 0,15 | n.a.             | n.a.          | n.a.                                | <i>BRCA2</i>          |
|          |            |        | 6    | c.1286delG     | p.R429fs     | 29       | 43        | 0,60 |                  |               |                                     |                       |
| 1804     | 66.3       | VFN    | 6    | c.A1645T       | p.K549X      | 76       | 12        | 0,14 | 8-Dec-2011       | 14-Sep-2005   | 6.23                                | -                     |
| 4179     | 66.5       | VFN    | 6    | c.C1654T       | p.R552X      | 106      | 22        | 0,17 | 14-Jun-2018      | 17-Jan-2018   | 0.41                                | -                     |
| 10018_17 | 67.0       | GEN    | 6    | c.G1270T       | p.E424X      | 51       | 9         | 0,15 | n.a.             | n.a.          | n.a.                                | -                     |
| 2915     | 67.2       | VFN    | 6    | c.1386_1387del | p.462_463del | 49       | 25        | 0,34 | 3-Nov-2015       | 25-Jun-2015   | 0.36                                | <i>PALB2</i>          |
| 8395_17  | 70.0       | GEN    | 6    | c.1612delT     | p.L538X      | 77       | 49        | 0,39 | n.a.             | n.a.          | n.a.                                | -                     |
| 1822     | 70.5       | VFN    | 6    | c.1607delG     | p.R536fs     | 93       | 22        | 0,19 | 12-Jan-2012      | 14-Dec-2010   | 1.08                                | <i>PMS1</i>           |



**Table S7.** Clinicopathological characteristics of mutation carriers in *NAT1*, *PPM1D*, and *SHPRH* significantly associated with OC risk.

| Category                    | N patients | <i>NAT1</i> | <i>PPM1D</i> | <i>SHPRH</i> | $\Sigma$ | %    |
|-----------------------------|------------|-------------|--------------|--------------|----------|------|
| <b>Age at diagnosis (y)</b> |            |             |              |              |          |      |
| 30-39                       | 152        | 4           |              |              | 4        | 2.63 |
| 40-49                       | 282        | 2           | 1            | 1            | 4        | 1.42 |
| 50-59                       | 360        | 3           | 3            | 1            | 7        | 1.94 |
| 60-69                       | 328        | 3           | 9            | 3            | 15       | 4.57 |
| >70                         | 94         | 1           | 2            |              | 3        | 3.19 |
| <b>Personal history</b>     |            |             |              |              |          |      |
| OC only                     | 1043       | 9           | 11           | 3            | 23       | 2.21 |
| OC & BC                     | 210        | 2           | 2            | 1            | 5        | 2.38 |
| OC & other cancer           | 78         | 2           | 2            | 1            | 5        | 6.41 |
| <b>Family history</b>       |            |             |              |              |          |      |
| HBOC                        | 345        | 2           | 4            | 1            | 7        | 2.03 |
| HOC                         | 119        | 2           | 1            |              | 3        | 2.52 |
| Multiple cancer             | 182        | 1           | 1            | 1            | 3        | 1.65 |
| None                        | 588        | 6           | 9            | 3            | 18       | 3.06 |
| n.a.                        | 99         | 2           |              |              | 2        | 2.02 |
| <b>Histology</b>            |            |             |              |              |          |      |
| HG serous                   | 478        | 3           | 5            | 3            | 11       | 2.30 |
| LG serous                   | 85         |             | 1            |              | 1        | 1.18 |
| Serous unspecified          | 165        | 2           | 4            | 1            | 7        | 4.24 |
| Endometrioid                | 90         |             | 3            |              | 3        | 3.33 |
| Clear cell                  | 15         | 1           |              |              | 1        | 6.67 |
| Other                       | 90         | 1           |              |              | 1        | 1.11 |
| Border-line                 | 154        | 3           |              |              | 3        | 1.95 |
| n.a.                        | 213        | 3           | 2            | 1            | 6        | 2.82 |
| $\Sigma$                    | 1333       | 13          | 16           | 5            | 34       | 2.55 |
